# Supplementary material for: Differential Distribution and Activity Profile of Acylpeptide Hydrolase in the Rat Seminiferous Epithelium
Source: MDPI journal article supplement (doi:10.3390/biomedicines10071591), 2022-07-04
Supplement: s1 [file s1]

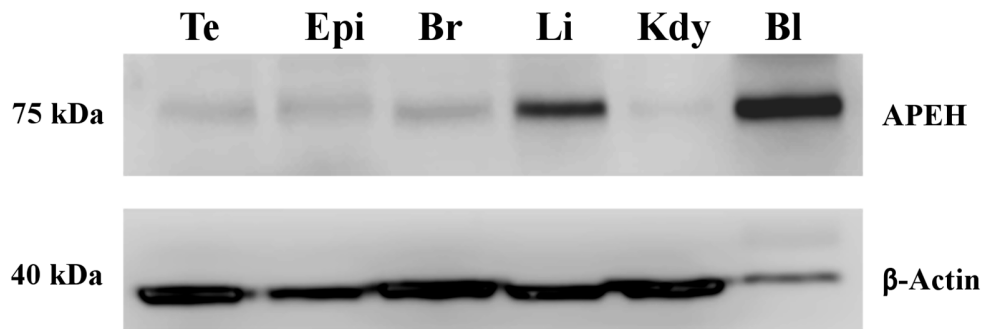

**Supplementary Figure S1. APEH levels from different tissues of perfused male rats.** (A) Protein extracts from testis (Te), epididymis (Epi), brain (Br), liver (Li), kidney (Kdy) and Blood (Bl) were obtained from male rats. Western blot analysis of these extracts (30  $\mu$ g/lane) were fractionated by SDS-PAGE, transferred to PDVF membrane and immunoblotted for APEH.

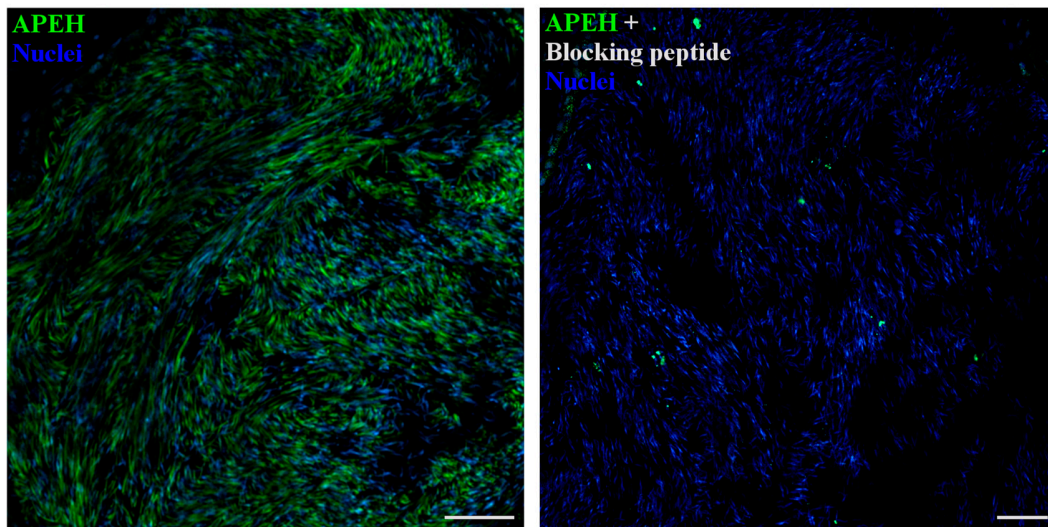

**Supplementary figure S2. Peptide competition control against APEH in rat epididymis.** (A) Epididymis cryosections were subjected to immunofluorescence against APEH (green). (B) Same as (A), but in the presence blocking peptide LS-E17431 (LSbio). Nuclei were stained with Hoechst 33342 (blue). Scale bar = 50  $\mu$ m.

**A****APEH exopeptidase activity**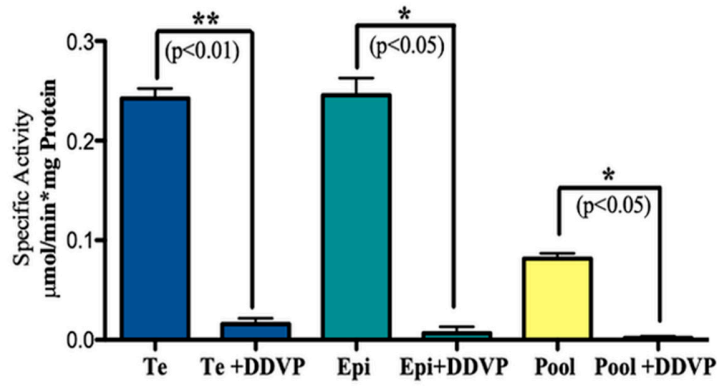**B**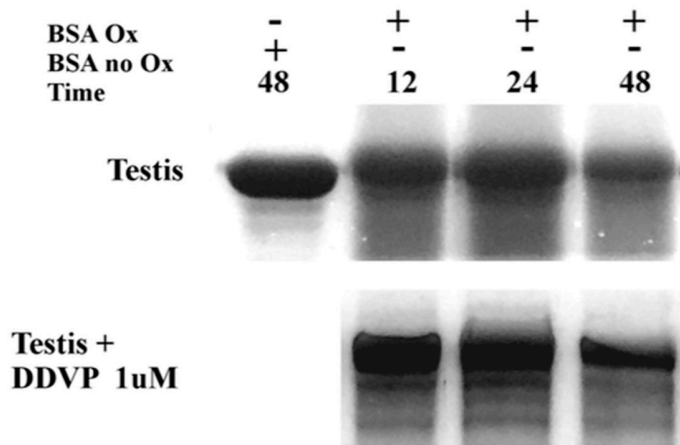**C**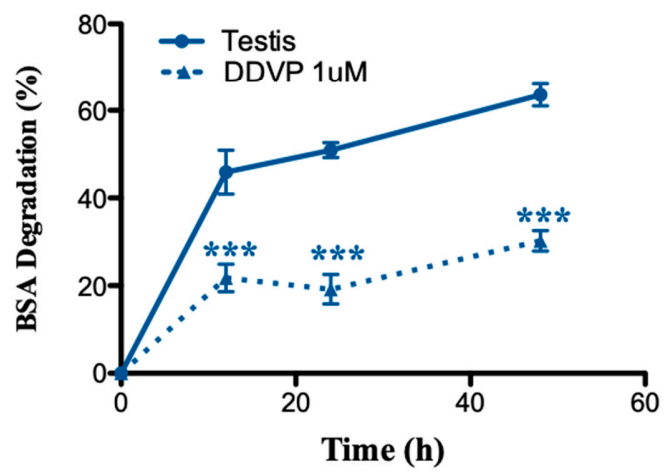

**Supplementary figure S3. Inhibition of APEH activity in reproductive tissues and isolated cells.** (A) Protein extracts from testis (Te), epididymis (Epi), and pooled germ cells (Pool) were obtained from male rats. Exopeptidase activity was measured at 37°C using N-acetyl-L-alanine p-nitroanilide (AANA) as substrate and results were expressed as specific activity. Protein extracts were incubated with 1 µM Dichlorvos (DDVP) for 1 h at room temperature. Results are representative of three independent experiments. (B) Endopeptidase activity was measured in testis by SDS-PAGE analysis of oxidized BSA incubated at 37°C with testis APEH in the presence or absence of 1 µM DDVP during 12, 24 and 48 hours. (C) Electrophoretic data expressed as BSA degradation percentage at the indicated incubation times versus time 0 obtained by densitometric analysis with Image J software. The results are representative of three independent experiments. Significant differences were found with 2-way ANOVA ( $p < 0.001$ ).
